# Supplementary material for: CXC chemokine receptor 4 (CXCR4) targeted gold nanoparticles potently enhance radiotherapy outcomes in breast cancer
Source: Royal Society of Chemistry journal article supplement (doi:10.1039/d1nr05385j), 2021-01-01
Supplement: d1nr05385j2.pdf [file d1nr05385j2.pdf]

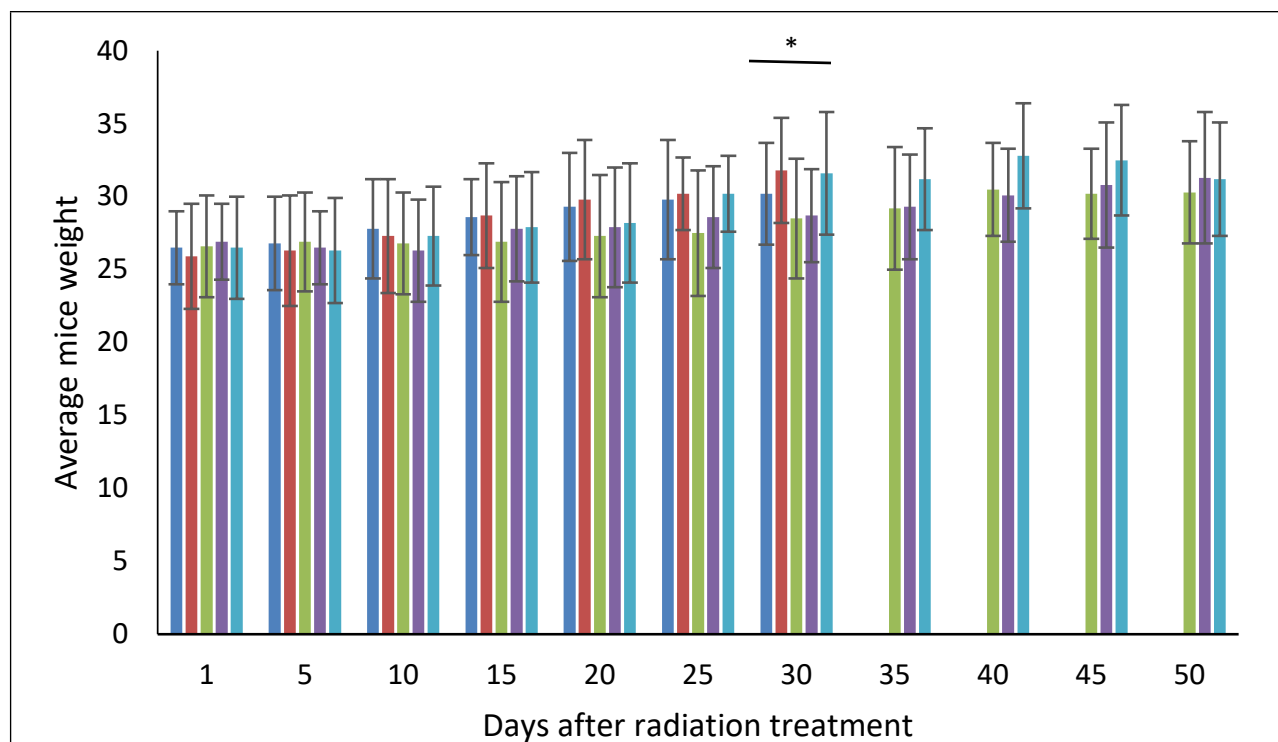

Figure S1: Weight of mice over time: We measured the weight of different treatment group of mice. No significant difference in mice weight was observed in any treatment groups on 30<sup>th</sup> day (\*  $P > 0.05$ ). No weight loss was observed in any experimental group.
