# Supplementary figures and images for: CXC chemokine receptor 4 (CXCR4) targeted gold nanoparticles potently enhance radiotherapy outcomes in breast cancer
Source: Royal Society of Chemistry journal article supplement (doi:10.1039/d1nr05385j), 2021-01-01

Figure S1

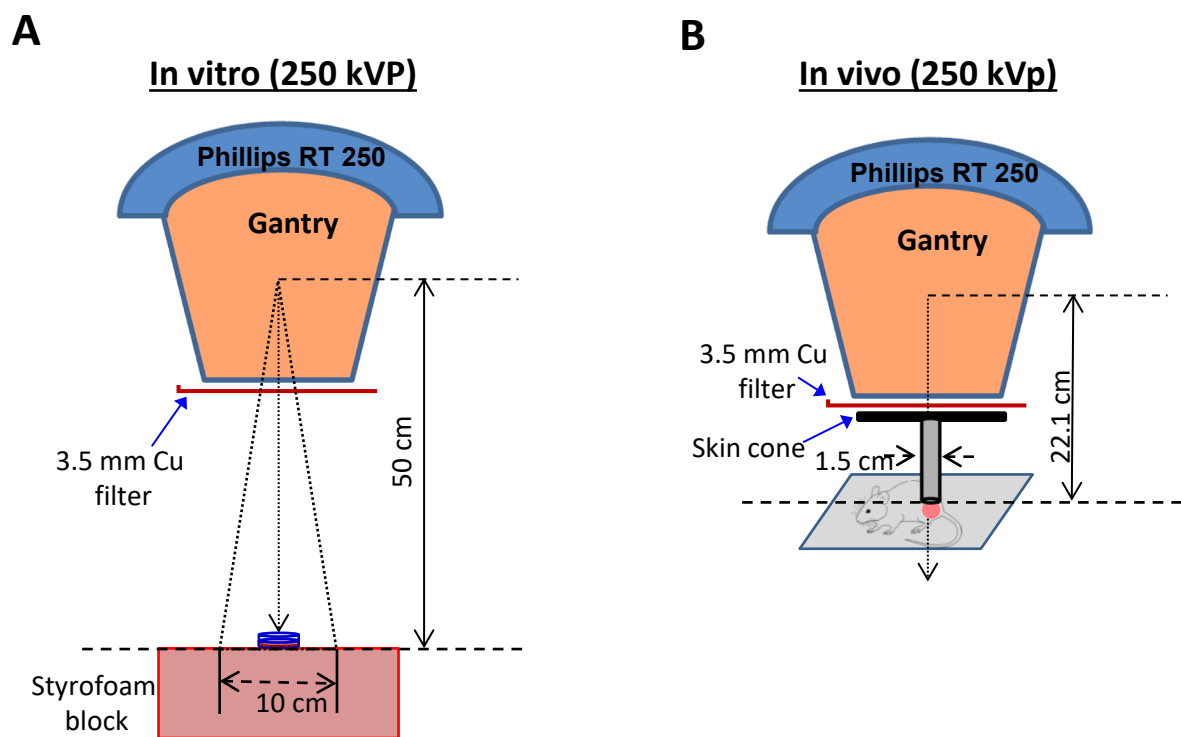

Supplement: d1nr05385j3.pdf [file d1nr05385j3.pdf]
